# Supplementary material for: High levels of TFAM repress mammalian mitochondrial DNA transcription in vivo
Source: Life Sci Alliance. 2021 Aug 30;4(11):e202101034. doi: 10.26508/lsa.202101034 (PMC8408345; doi:10.26508/lsa.202101034)
Supplement: Supplementary file 1 [file LSA-2021-01034_SdataF1.xlsx]

## Sheet: Figure 1C
		+/+																+/BAC(#0139)
	heart	0.480928	0.924059	0.695618	0.957678	1.33155	1.61017	0.760613	0.681653	0.713811	0.948902	1.07951	1.2449	1.33123				2.18293	1.17849	1.3407	1.58614	2.36081	1.28757	1.03484	0.956979	1.68364	2.28879	1.98698
	liver	1.02651	0.760925	0.935319	1.05186	1.00783	1.21756	1.00622	0.969838	0.996388	0.953293	1.07427						1.59557	1.5115	1.47083	1.79702	1.78331	1.16782	1.341	1.43163	1.42588	1.34035	1.47679	1.0085
	skeletal muscle	1.13933	1.11443	0.882282	0.837243	1.28048	1.05127	1.02044	0.928298									1.90014	1.86328	1.30932	1.18333	1.97031	1.33647	1.18013	1.36305
	Two-way ANOVA	Ordinary
	Alpha	0.05
	Source of Variation	% of total variation	P value	P value summary	Significant?
	Interaction	1.272	0.519	ns	No
	Row Factor	0.7684	0.6718	ns	No
	Column Factor	41.4	<0,0001	****	Yes
	ANOVA table	SS (Type III)	DF	MS	F (DFn, DFd)	P value
	Interaction	0.1283	2	0.06413	F (2, 57) = 0,6634	P=0,5190
	Row Factor	0.07746	2	0.03873	F (2, 57) = 0,4006	P=0,6718
	Column Factor	4.174	1	4.174	F (1, 57) = 43,17	P<0,0001
	Residual	5.51	57	0.09667
	Difference between column means
	Predicted (LS) mean of +/+	1.004
	Predicted (LS) mean of +/BAC(#0139)	1.528
	Difference between predicted means	-0.524
	SE of difference	0.07975
	95% CI of difference	-0,6837 to -0,3643
	Data summary
	Number of columns (Column Factor)	2
	Number of rows (Row Factor)	3
	Number of values	63
	Compare each cell mean with the other cell mean in that row
	Number of families	1
	Number of comparisons per family	3
	Alpha	0.05
	Šídák's multiple comparisons test	Predicted (LS) mean diff,	95,00% CI of diff,	Below threshold?	Summary	Adjusted P Value
	+/+ - +/BAC(#0139)
	heart	-0.6446	-0,9579 to -0,3313	Yes	****	<0,0001
	liver	-0.4459	-0,7651 to -0,1266	Yes	**	0.0033
	skeletal muscle	-0.4815	-0,8639 to -0,09912	Yes	**	0.0091
	Test details	Predicted (LS) mean 1	Predicted (LS) mean 2	Predicted (LS) mean diff,	SE of diff,	N1	N2	t	DF
	+/+ - +/BAC(#0139)
	heart	0.9816	1.626	-0.6446	0.1274	13	11	5.061	57
	liver	1	1.446	-0.4459	0.1298	11	12	3.435	57
	skeletal muscle	1.032	1.513	-0.4815	0.1555	8	8	3.098	57

## Sheet: Figure 1E
	heart	+/+					+/BAC (#0139)
	CytB	1.06204	1.01578	1.31073	0.798012	0.813435		1.35429	0.956838	0.617161	1.01995
	ND1	0.995785	0.972896	1.29646	0.863401	0.871459		1.41109	1.0238	0.615991	1.06014
	COX1	1.0704	1.04084	1.23556	0.847074	0.806129		1.29801	0.987625	0.607202	0.978917
	12S rRNA	1.17543	1.02816	1.41561	0.71412	0.666692		1.35097	0.957695	0.675966	0.988074
	Liver
	CytB	1.10736	1.02468	1.23539	0.854836	0.77774	0.895904	1.02787	0.74553	0.692892	0.685259
	ND1	1.02573	0.959593	1.25446	0.893335	0.866883	0.881085	1.27822	1.04802	0.906657	1.10496
	COX1	1.08473	1.03084	1.1915	0.821081	0.871852	0.847464	1.15078	0.908992	0.843215	0.909508
	12S rRNA	1.08227	1.00191	1.31823	0.818478	0.779111	0.98135	1.12142	0.796112	0.737437	0.845476
	Two-way ANOVA	Ordinary						Compare each cell mean with the other cell mean in that row
	Alpha	0.05
								Number of families	1
	Source of Variation	% of total variation	P value	P value summary	Significant?			Number of comparisons per family	8
	Interaction	3.353	0.9457	ns	No			Alpha	0.05
	Row Factor	3.353	0.9457	ns	No
	Column Factor	1.154	0.3891	ns	No			Šídák's multiple comparisons test	Predicted (LS) mean diff,	95,00% CI of diff,	Below threshold?	Summary	Adjusted P Value
	ANOVA table	SS (Type III)	DF	MS	F (DFn, DFd)	P value		+/+ - +/BAC (#0139)
	Interaction	0.1002	7	0.01432	F (7, 60) = 0,3124	P=0,9457		CytB	0.01294	-0,3929 to 0,4188	No	ns	>0,9999
	Row Factor	0.1002	7	0.01432	F (7, 60) = 0,3124	P=0,9457		ND1	-0.02775	-0,4336 to 0,3781	No	ns	>0,9999
	Column Factor	0.03449	1	0.03449	F (1, 60) = 0,7525	P=0,3891		COX1	0.03206	-0,3738 to 0,4379	No	ns	>0,9999
	Residual	2.75	60	0.04584				12S rRNA	0.006824	-0,3991 to 0,4127	No	ns	>0,9999
								CytB	0.1905	-0,1922 to 0,5732	No	ns	0.7628
	Difference between column means							ND1	-0.04379	-0,4265 to 0,3389	No	ns	>0,9999
	Predicted (LS) mean of +/+	1						COX1	0.06801	-0,3147 to 0,4507	No	ns	0.9995
	Predicted (LS) mean of +/BAC (#0139)	0.9572						12S rRNA	0.1036	-0,2790 to 0,4863	No	ns	0.9913
	Difference between predicted means	0.04281
	SE of difference	0.04935
	95% CI of difference	-0,05590 to 0,1415						Test details	Predicted (LS) mean 1	Predicted (LS) mean 2	Predicted (LS) mean diff,	SE of diff,	N1	N2	t	DF
	Data summary							+/+ - +/BAC (#0139)
	Number of columns (Column Factor)	2						CytB	1	0.9871	0.01294	0.1436	5	4	0.0901	60
	Number of rows (Row Factor)	8						ND1	1	1.028	-0.02775	0.1436	5	4	0.1932	60
	Number of values	76						COX1	1	0.9679	0.03206	0.1436	5	4	0.2232	60
								12S rRNA	1	0.9932	0.006824	0.1436	5	4	0.04752	60
								CytB	1	0.8095	0.1905	0.1354	5	5	1.407	60
								ND1	1	1.044	-0.04379	0.1354	5	5	0.3234	60
								COX1	1	0.932	0.06801	0.1354	5	5	0.5023	60
								12S rRNA	1	0.8964	0.1036	0.1354	5	5	0.7654	60

## Sheet: Figure 1G
	10 weeks	+/+										+/BAC
	Male, day	0.913098	0.887968	0.888236	0.901312	0.880821	0.944988					0.917676	0.830375	0.892687	0.90078	0.992025	0.875197	0.880509	0.956131	0.932137
	Female, day		0.863406	0.876868	0.857093	0.896786	0.909052					0.864883	0.874877	0.869528	0.840108	0.89935	0.89574	0.902898	0.908418
	Male, night	0.992607	1.01633	1.01703	0.977205	0.953472	1.03169					1.04209	0.952294	0.949299	1.00022	1.05485	0.998506	1.01266	1.02668	1.0507
	Female, night		0.972943	0.970254	0.927122	1.00543	1.00192					0.980541	0.987382	1.00763	0.95967	0.995545	0.97008	1.00693	1.04886
	52 weeks
	Male, day	0.878022	0.875755	0.888727	0.856253	0.910973	0.854443					0.95816	0.953066	0.958088	0.983469	0.979196	0.950068
	Female, day	0.957572	0.860765	0.899807	0.91351	0.872499	0.854905					0.83609	0.882548	0.901974	0.945319	0.873644	0.899239	0.857574
	Male, night	0.907485	0.946474	0.820715	0.903462	0.891995	0.92621	0.919637				0.975933	0.983254	0.91576	0.998329	0.95026	0.975236	0.984786
	Female, night	0.987066	0.960306	0.994089	1.00459	0.971729	0.966369					0.916156	0.920671	0.997351	1.02902	0.971004	1.03585	0.96465
	Two-way ANOVA	Ordinary						Compare each cell mean with the other cell mean in that row
	Alpha	0.05
								Number of families	1
	Source of Variation	% of total variation	P value	P value summary	Significant?			Number of comparisons per family	8
	Interaction	7.738	0.0019	**	Yes			Alpha	0.05
	Row Factor	56.86	<0,0001	****	Yes
	Column Factor	3.714	0.0008	***	Yes			Šídák's multiple comparisons test	Predicted (LS) mean diff,	95,00% CI of diff,	Below threshold?	Summary	Adjusted P Value
	ANOVA table	SS (Type III)	DF	MS	F (DFn, DFd)	P value		+/+ - +/BAC
	Interaction	0.02723	7	0.003891	F (7, 92) = 3,575	P=0,0019		Male, day	-0.005876	-0,05440 to 0,04265	No	ns	>0,9999		10w
	Row Factor	0.2001	7	0.02859	F (7, 92) = 26,27	P<0,0001		Female, day	-0.001334	-0,05382 to 0,05116	No	ns	>0,9999
	Column Factor	0.01307	1	0.01307	F (1, 92) = 12,01	P=0,0008		Male, night	-0.01164	-0,06017 to 0,03688	No	ns	0.9964
	Residual	0.1001	92	0.001088				Female, night	-0.01905	-0,07154 to 0,03344	No	ns	0.9509
								Male, day	-0.08631	-0,1395 to -0,03315	Yes	***	0.0001		52w
	Difference between column means							Female, day	0.007978	-0,04325 to 0,05920	No	ns	0.9998
	Predicted (LS) mean of +/+	0.9263						Male, night	-0.0668	-0,1160 to -0,01758	Yes	**	0.0022
	Predicted (LS) mean of +/BAC	0.9487						Female, night	0.004306	-0,04692 to 0,05553	No	ns	>0,9999
	Difference between predicted means	-0.02234
	SE of difference	0.006447
	95% CI of difference	-0,03514 to -0,009537						Test details	Predicted (LS) mean 1	Predicted (LS) mean 2	Predicted (LS) mean diff,	SE of diff,	N1	N2	t	DF
	Data summary							+/+ - +/BAC
	Number of columns (Column Factor)	2						Male, day	0.9027	0.9086	-0.005876	0.01739	6	9	0.3379	92
	Number of rows (Row Factor)	8						Female, day	0.8806	0.882	-0.001334	0.01881	5	8	0.07093	92
	Number of values	108						Male, night	0.9981	1.01	-0.01164	0.01739	6	9	0.6696	92
								Female, night	0.9755	0.9946	-0.01905	0.01881	5	8	1.013	92
								Male, day	0.8774	0.9637	-0.08631	0.01905	6	6	4.531	92
								Female, day	0.8932	0.8852	0.007978	0.01835	6	7	0.4347	92
								Male, night	0.9023	0.9691	-0.0668	0.01763	7	7	3.788	92
								Female, night	0.9807	0.9764	0.004306	0.01835	6	7	0.2346	92

## Sheet: Figure 1H
	10 w	+/+										+/BAC
	Male, day	243.892	111.207	478.09	207.734	96.4495	183.304					627.622	239.117	81.7928	809.064	277.211	269.037	140.688	283.884	128.152
	Female, day	331.333	1129.29	384.358	303.541	491.268	166.929					464.477	535.126	358.33	381.22	669.138	376.152	991.786	298.366
	Male, night	1015.49	509.464	2845.95	621.054	642.018	661.382					1791.16	1814.62	754.8	2624	754.134	1120.08	1342.73	1353.63	579.645
	Female, night	1945.77	4465.25	1607.09	1726.64	2495.85	1185.71					2799.25	3495.84	1386.67	1790.83	2046.05	1753.79	2600.01	2115.42
	52w
	Male, day	285.229	257.76	411.104	61.7604	453.552	177.885					237.885	247.375	128.625	625.667	236.479	600.01	126.823
	Female, day	602.573	612.115	637.542	402.26	582.292	336.521					474.031	359.656	684.188	485.302	464.781	288.792	487.188
	Male, night	1526.31	784.698	1192.36	522.875	1205.73	512.229					1009.4	1005.57	524.052	1858.4	442.125	1790.95	432.5
	Female, night	1585.92	1998.52	1736.01	1240.46	2355.33	1245.32					4336.89	3744.68	1772.84	1762.24	1573.68	1487.24	1860.01
	Two-way ANOVA	Ordinary						Compare each cell mean with the other cell mean in that row
	Alpha	0.05
								Number of families	1
	Source of Variation	% of total variation	P value	P value summary	Significant?			Number of comparisons per family	8
	Interaction	1.402	0.7994	ns	No			Alpha	0.05
	Row Factor	61.54	<0,0001	****	Yes
	Column Factor	0.6004	0.205	ns	No			Šídák's multiple comparisons test	Predicted (LS) mean diff,	95,00% CI of diff,	Below threshold?	Summary	Adjusted P Value
	ANOVA table	SS (Type III)	DF	MS	F (DFn, DFd)	P value		+/+ - +/BAC
	Interaction	1285620	7	183660	F (7, 94) = 0,5435	P=0,7994		Male, day	-97.28	-952,0 to 757,4	No	ns	>0,9999		10w
	Row Factor	56421208	7	8060173	F (7, 94) = 23,85	P<0,0001		Female, day	-41.54	-917,3 to 834,2	No	ns	>0,9999
	Column Factor	550488	1	550488	F (1, 94) = 1,629	P=0,2050		Male, night	-299.1	-1154 to 555,6	No	ns	0.9601
	Residual	31767099	94	337948				Female, night	-10.76	-886,5 to 865,0	No	ns	>0,9999
								Male, day	-40.15	-942,3 to 862,0	No	ns	>0,9999		52w
	Difference between column means							Female, day	65.46	-836,7 to 967,7	No	ns	>0,9999
	Predicted (LS) mean of +/+	928.7						Male, night	-51.63	-953,8 to 850,6	No	ns	>0,9999
	Predicted (LS) mean of +/BAC	1072						Female, night	-668.9	-1571 to 233,3	No	ns	0.2868
	Difference between predicted means	-143
	SE of difference	112
	95% CI of difference	-365,4 to 79,46						Test details	Predicted (LS) mean 1	Predicted (LS) mean 2	Predicted (LS) mean diff,	SE of diff,	N1	N2	t	DF
	Data summary							+/+ - +/BAC
	Number of columns (Column Factor)	2						Male, day	220.1	317.4	-97.28	306.4	6	9	0.3175	94
	Number of rows (Row Factor)	8						Female, day	467.8	509.3	-41.54	314	6	8	0.1323	94
	Number of values	110						Male, night	1049	1348	-299.1	306.4	6	9	0.9762	94
								Female, night	2238	2248	-10.76	314	6	8	0.03428	94
								Male, day	274.5	314.7	-40.15	323.4	6	7	0.1241	94
								Female, day	528.9	463.4	65.46	323.4	6	7	0.2024	94
								Male, night	957.4	1009	-51.63	323.4	6	7	0.1596	94
								Female, night	1694	2363	-668.9	323.4	6	7	2.068	94
