# Supplementary material for: High levels of TFAM repress mammalian mitochondrial DNA transcription in vivo
Source: Life Sci Alliance. 2021 Aug 30;4(11):e202101034. doi: 10.26508/lsa.202101034 (PMC8408345; doi:10.26508/lsa.202101034)
Supplement: Supplementary file 3 [file LSA-2021-01034_SdataFS1.xlsx]

## Sheet: Figure S1B
		+/+												+/BAC(TG188)												+/BAC(TG137)												+/BAC(TG91)
	heart	0.452481	0.585235	0.300025	0.998951	1.06324	2.60007	0.506331	0.709924	0.667202	1.34151	0.956425	1.81861	0.806787	2.27678	1.48199	0.764473	3.01988	2.35558							1.51076	2.20936	1.15352	1.87216	1.97861	1.02408							0.830638	1.86865	1.2966	1.11805	2.2161
	liver	0.867049	1.11563	1.12245	1.11756	0.889656	0.887642	0.969111	1.05302	1.14047	1.03843	0.9627	0.836267	1.13339	1.20212	1.15736	1.02921	1.07263	1.1958							1.35125	1.552	1.45819	1.57919	1.51065	1.56011							1.62648	1.29975	1.35466	1.25572	1.4294
	skeletal muscle	1.20628	0.773519	1.42891	0.91968	0.671609		1.53342	1.26567	0.842113	0.650118			1.42203	1.25121	1.46456	1.27585	0.883475								1.14455	1.37973	1.64177	1.5685	1.70894								2.17796	1.24114	1.34834	1.74733	1.89571
	Two-way ANOVA	Ordinary					BAC TG 188					Two-way ANOVA	Ordinary					BAC TG 137					Two-way ANOVA	Ordinary					Bac TG 91
	Alpha	0.05										Alpha	0.05										Alpha	0.05
	Source of Variation	% of total variation	P value	P value summary	Significant?							Source of Variation	% of total variation	P value	P value summary	Significant?							Source of Variation	% of total variation	P value	P value summary	Significant?
	Interaction	7.306	0.1343	ns	No							Interaction	0.5427	0.8411	ns	No							Interaction	1.098	0.731	ns	No
	Row Factor	6.863	0.1509	ns	No							Row Factor	0.3296	0.9001	ns	No							Row Factor	1.779	0.6032	ns	No
	Column Factor	12.09	0.0115	*	Yes							Column Factor	29.71	<0,0001	****	Yes							Column Factor	24.46	0.0005	***	Yes
	ANOVA table	SS (Type III)	DF	MS	F (DFn, DFd)	P value						ANOVA table	SS (Type III)	DF	MS	F (DFn, DFd)	P value						ANOVA table	SS (Type III)	DF	MS	F (DFn, DFd)	P value
	Interaction	0.9738	2	0.4869	F (2, 44) = 2,102	P=0,1343						Interaction	0.05644	2	0.02822	F (2, 44) = 0,1738	P=0,8411						Interaction	0.1164	2	0.05819	F (2, 42) = 0,3157	P=0,7310
	Row Factor	0.9148	2	0.4574	F (2, 44) = 1,975	P=0,1509						Row Factor	0.03428	2	0.01714	F (2, 44) = 0,1055	P=0,9001						Row Factor	0.1886	2	0.09429	F (2, 42) = 0,5116	P=0,6032
	Column Factor	1.611	1	1.611	F (1, 44) = 6,954	P=0,0115						Column Factor	3.089	1	3.089	F (1, 44) = 19,02	P<0,0001						Column Factor	2.594	1	2.594	F (1, 42) = 14,07	P=0,0005
	Residual	10.19	44	0.2317								Residual	7.145	44	0.1624								Residual	7.741	42	0.1843
	Difference between column means											Difference between column means											Difference between column means
	Predicted (LS) mean of +/+	1.011										Predicted (LS) mean of +/+	1.011										Predicted (LS) mean of +/+	1.011
	Predicted (LS) mean of +/BAC(TG188)	1.392										Predicted (LS) mean of +/BAC(TG137)	1.538										Predicted (LS) mean of +/BAC(TG91)	1.514
	Difference between predicted means	-0.381										Difference between predicted means	-0.5277										Difference between predicted means	-0.503
	SE of difference	0.1445										SE of difference	0.121										SE of difference	0.1341
	95% CI of difference	-0,6722 to -0,08982										95% CI of difference	-0,7715 to -0,2838										95% CI of difference	-0,7736 to -0,2324
	Data summary											Data summary											Data summary
	Number of columns (Column Factor)	2										Number of columns (Column Factor)	2										Number of columns (Column Factor)	2
	Number of rows (Row Factor)	3										Number of rows (Row Factor)	3										Number of rows (Row Factor)	3
	Number of values	50										Number of values	50										Number of values	48
	Compare each cell mean with the other cell mean in that row											Compare each cell mean with the other cell mean in that row											Compare each cell mean with the other cell mean in that row
	Number of families	1										Number of families	1										Number of families	1
	Number of comparisons per family	3										Number of comparisons per family	3										Number of comparisons per family	3
	Alpha	0.05										Alpha	0.05										Alpha	0.05
	Šídák's multiple comparisons test	Predicted (LS) mean diff,	95,00% CI of diff,	Below threshold?	Summary	Adjusted P Value						Šídák's multiple comparisons test	Predicted (LS) mean diff,	95,00% CI of diff,	Below threshold?	Summary	Adjusted P Value						Šídák's multiple comparisons test	Predicted (LS) mean diff,	95,00% CI of diff,	Below threshold?	Summary	Adjusted P Value
	+/+ - +/BAC(TG188)											+/+ - +/BAC(TG137)											+/+ - +/BAC(TG91)
	heart	-0.7842	-1,382 to -0,1869	Yes	**	0.0065						heart	-0.6248	-1,125 to -0,1246	Yes	*	0.0101						heart	-0.466	-1,034 to 0,1022	No	ns	0.1365
	liver	-0.1318	-0,7291 to 0,4656	No	ns	0.9295						liver	-0.5019	-1,002 to -0,001782	Yes	*	0.0489						liver	-0.3932	-0,9615 to 0,1751	No	ns	0.253
	skeletal muscle	-0.2271	-0,8934 to 0,4393	No	ns	0.7864						skeletal muscle	-0.4563	-1,014 to 0,1016	No	ns	0.1383						skeletal muscle	-0.6497	-1,245 to -0,05427	Yes	*	0.0286
	Test details	Predicted (LS) mean 1	Predicted (LS) mean 2	Predicted (LS) mean diff,	SE of diff,	N1	N2	t	DF			Test details	Predicted (LS) mean 1	Predicted (LS) mean 2	Predicted (LS) mean diff,	SE of diff,	N1	N2	t	DF			Test details	Predicted (LS) mean 1	Predicted (LS) mean 2	Predicted (LS) mean diff,	SE of diff,	N1	N2	t	DF
	+/+ - +/BAC(TG188)											+/+ - +/BAC(TG137)											+/+ - +/BAC(TG91)
	heart	1	1.784	-0.7842	0.2407	12	6	3.259	44			heart	1	1.625	-0.6248	0.2015	12	6	3.101	44			heart	1	1.466	-0.466	0.2285	12	5	2.039	42
	liver	1	1.132	-0.1318	0.2407	12	6	0.5475	44			liver	1	1.502	-0.5019	0.2015	12	6	2.491	44			liver	1	1.393	-0.3932	0.2285	12	5	1.721	42
	skeletal muscle	1.032	1.259	-0.2271	0.2685	9	5	0.8458	44			skeletal muscle	1.032	1.489	-0.4563	0.2248	9	5	2.03	44			skeletal muscle	1.032	1.682	-0.6497	0.2395	9	5	2.713	42

## Sheet: Figure S1C
		+/+														+/BAC (#0111)														+/BAC(#0139)														+/BAC(#0262)
	heart	0.480928	0.924059	0.695618	0.957678	1.33155	1.61017	0.760613	0.681653	0.713811	0.948902	1.07951	1.2449	1.33123		1.09978	0.581135	1.14614	1.50595	1.04208	1.36022	1.06258	1.23135	1.08314	2.4017	1.67802	2.00968			2.18293	1.17849	1.3407	1.58614	2.36081	1.28757	1.03484	0.956979	1.68364	2.28879	1.98698				1.10205	1.44313	1.70238	2.32415	1.41733	1.48279
	liver	1.02651	0.760925	0.935319	1.05186	1.00783	1.21756	1.00622	0.969838	0.996388	0.953293	1.07427				1.2031	0.918659	1.13897	1.87409	1.84568	1.76413	0.626336	1.51444	0.930807	0.952373	0.856084	1.53729			1.59557	1.5115	1.47083	1.79702	1.78331	1.16782	1.341	1.43163	1.42588	1.34035	1.47679	1.0085			2.17577	1.57627	1.44579	1.95376	2.01105	2.07806
	sk. Muscle	0.746245	1.13933	1.11443	0.882282	0.837243	1.28048	1.05127	1.02044	0.928298						1.06682	1.36454	1.29459	0.459994	0.989163	1.46271									1.90014	1.86328	1.30932	1.18333	1.97031	1.33647	1.18013	1.36305							2.11843	1.95979	1.59718	1.59871	1.59288	0.719401
	ANOVA summary			heart				Number of families	1
	F	7.44						Number of comparisons per family	3
	P value	0.0004						Alpha	0.05
	P value summary	***
	Significant diff. among means (P < 0.05)?	Yes						Dunnett's multiple comparisons test	Mean Diff,	95,00% CI of diff,	Below threshold?	Summary	Adjusted P Value	A-?
	R squared	0.3417						+/+ vs. +/BAC (#0111)	-0.3686	-0,7927 to 0,05554	No	ns	0.1015	B	+/BAC (#0111)
								+/+ vs. +/BAC(#0139)	-0.6446	-1,079 to -0,2106	Yes	**	0.0022	C	+/BAC(#0139)
	Brown-Forsythe test							+/+ vs. +/BAC(#0262)	-0.7668	-1,201 to -0,3328	Yes	***	0.0003	D	+/BAC(#0262)
	F (DFn, DFd)	0,8908 (3, 43)
	P value	0.4536						Test details	Mean 1	Mean 2	Mean Diff,	SE of diff,	n1	n2	q	DF
	P value summary	ns						+/+ vs. +/BAC (#0111)	0.9816	1.35	-0.3686	0.1737	13	12	2.122	43
	Are SDs significantly different (P < 0.05)?	No						+/+ vs. +/BAC(#0139)	0.9816	1.626	-0.6446	0.1777	13	11	3.626	43
								+/+ vs. +/BAC(#0262)	0.9816	1.748	-0.7668	0.1777	13	11	4.314	43
	Bartlett's test
	Bartlett's statistic (corrected)	2.664
	P value	0.4463
	P value summary	ns
	Are SDs significantly different (P < 0.05)?	No
	ANOVA table	SS	DF	MS	F (DFn, DFd)	P value
	Treatment (between columns)	4.202	3	1.401	F (3, 43) = 7,440	P=0,0004
	Residual (within columns)	8.095	43	0.1883
	Total	12.3	46
	Data summary
	Number of treatments (columns)	4
	Number of values (total)	47
	ANOVA summary				liver			Number of families	1
	F	14.81						Number of comparisons per family	3
	P value	<0,0001						Alpha	0.05
	P value summary	****
	Significant diff. among means (P < 0.05)?	Yes						Dunnett's multiple comparisons test	Mean Diff,	95,00% CI of diff,	Below threshold?	Summary	Adjusted P Value	A-?
	R squared	0.514						+/+ vs. +/BAC (#0111)	-0.2635	-0,5487 to 0,02171	No	ns	0.0757	B	+/BAC (#0111)
								+/+ vs. +/BAC(#0139)	-0.4459	-0,7311 to -0,1606	Yes	**	0.0013	C	+/BAC(#0139)
	Brown-Forsythe test							+/+ vs. +/BAC(#0262)	-0.7733	-1,065 to -0,4820	Yes	****	<0,0001	D	+/BAC(#0262)
	F (DFn, DFd)	6,286 (3, 42)
	P value	0.0013						Test details	Mean 1	Mean 2	Mean Diff,	SE of diff,	n1	n2	q	DF
	P value summary	**						+/+ vs. +/BAC (#0111)	1	1.263	-0.2635	0.1172	11	12	2.249	42
	Are SDs significantly different (P < 0.05)?	Yes						+/+ vs. +/BAC(#0139)	1	1.446	-0.4459	0.1172	11	12	3.805	42
								+/+ vs. +/BAC(#0262)	1	1.773	-0.7733	0.1197	11	11	6.461	42
	Bartlett's test
	Bartlett's statistic (corrected)	16.18
	P value	0.001
	P value summary	**
	Are SDs significantly different (P < 0.05)?	Yes
	ANOVA table	SS	DF	MS	F (DFn, DFd)	P value
	Treatment (between columns)	3.5	3	1.167	F (3, 42) = 14,81	P<0,0001
	Residual (within columns)	3.309	42	0.07879
	Total	6.81	45
	Data summary
	Number of treatments (columns)	4
	Number of values (total)	46
	ANOVA summary							Number of families	1
	F	5.619						Number of comparisons per family	3
	P value	0.0044						Alpha	0.05
	P value summary	**
	Significant diff. among means (P < 0.05)?	Yes						Dunnett's multiple comparisons test	Mean Diff,	95,00% CI of diff,	Below threshold?	Summary	Adjusted P Value	A-?
	R squared	0.4027						+/+ vs. +/BAC (#0111)	-0.1063	-0,5545 to 0,3419	No	ns	0.8896	B	+/BAC (#0111)
								+/+ vs. +/BAC(#0139)	-0.5133	-0,9264 to -0,1001	Yes	*	0.0125	C	+/BAC(#0139)
	Brown-Forsythe test							+/+ vs. +/BAC(#0262)	-0.5977	-1,046 to -0,1496	Yes	**	0.0071	D	+/BAC(#0262)
	F (DFn, DFd)	0,7274 (3, 25)
	P value	0.5452						Test details	Mean 1	Mean 2	Mean Diff,	SE of diff,	n1	n2	q	DF
	P value summary	ns						+/+ vs. +/BAC (#0111)	1	1.106	-0.1063	0.1781	9	6	0.5967	25
	Are SDs significantly different (P < 0.05)?	No						+/+ vs. +/BAC(#0139)	1	1.513	-0.5133	0.1642	9	8	3.125	25
								+/+ vs. +/BAC(#0262)	1	1.598	-0.5977	0.1781	9	6	3.355	25
	Bartlett's test
	Bartlett's statistic (corrected)	6.485
	P value	0.0903
	P value summary	ns
	Are SDs significantly different (P < 0.05)?	No
	ANOVA table	SS	DF	MS	F (DFn, DFd)	P value
	Treatment (between columns)	1.926	3	0.642	F (3, 25) = 5,619	P=0,0044
	Residual (within columns)	2.856	25	0.1143
	Total	4.782	28
	Data summary
	Number of treatments (columns)	4
	Number of values (total)	29
[truncated: 5 more columns]

## Sheet: Figure S1F
		CytB									ND1									Cox1									12S									16S									tA
	+/+	1.00917	0.945959	1.04487							1.06339	0.990905	0.94571							1.05853	0.946768	0.994698							1.02626	0.978443	0.995293							0.982086	0.892271	1.12564							1.00527	1.02389	0.970842
	+/BAC(#0111)	1.08773	0.858535	0.799164							1.05374	0.789202	0.759282							0.989471	0.91202	0.817253							1.2567	1.27154	1.1797							1.13704	1.07475	1.04989							1.07268	0.845704	0.629488
	+/BAC (#0139)	0.683562	0.775858	0.988584							0.549009	0.647786	0.796373							0.638396	0.729997	0.906035							1.0305	1.13566	1.45103							0.851111	1.13451	1.50335							0.849034	0.861115	0.786209
	+/BAC (#0262)	0.906905	1.09809	1.15431							0.841408	1.07303	1.11493							1.10648	1.29329	1.60792							1.49674	1.75563	1.59169							1.24162	1.17344	1.29359							0.8319	0.956999	0.661611
	Two-way ANOVA	Ordinary						Within each column, compare rows (simple effects within columns)
	Alpha	0.05
								Number of families	9
	Source of Variation	% of total variation	P value	P value summary	Significant?			Number of comparisons per family	3
	Interaction	24.97	0.0009	***	Yes			Alpha	0.05
	Row Factor	11.51	<0,0001	****	Yes
	Column Factor	34.99	<0,0001	****	Yes			Šídák's multiple comparisons test	Mean Diff,	95,00% CI of diff,	Below threshold?	Summary	Adjusted P Value
	ANOVA table	SS	DF	MS	F (DFn, DFd)	P value		CytB
	Interaction	1.276	24	0.05317	F (24, 72) = 2,627	P=0,0009		+/+ vs. +/BAC(#0111)	0.08486	-0,1991 to 0,3688	No	ns	0.849
	Row Factor	0.588	3	0.196	F (3, 72) = 9,683	P<0,0001		+/+ vs. +/BAC (#0139)	0.184	-0,09998 to 0,4680	No	ns	0.3129
	Column Factor	1.788	8	0.2235	F (8, 72) = 11,04	P<0,0001		+/+ vs. +/BAC (#0262)	-0.0531	-0,3371 to 0,2309	No	ns	0.9567
	Residual	1.457	72	0.02024
								ND1
	Data summary							+/+ vs. +/BAC(#0111)	0.1326	-0,1514 to 0,4166	No	ns	0.5906
	Number of columns (Column Factor)	9						+/+ vs. +/BAC (#0139)	0.3356	0,05164 to 0,6196	Yes	*	0.0152
	Number of rows (Row Factor)	4						+/+ vs. +/BAC (#0262)	-0.00979	-0,2938 to 0,2742	No	ns	0.9997
	Number of values	108
								Cox1
								+/+ vs. +/BAC(#0111)	0.09375	-0,1902 to 0,3777	No	ns	0.8072
								+/+ vs. +/BAC (#0139)	0.2419	-0,04212 to 0,5258	No	ns	0.1177
								+/+ vs. +/BAC (#0262)	-0.3359	-0,6199 to -0,05192	Yes	*	0.0151
								12S
								+/+ vs. +/BAC(#0111)	-0.236	-0,5200 to 0,04800	No	ns	0.1315
								+/+ vs. +/BAC (#0139)	-0.2057	-0,4897 to 0,07825	No	ns	0.2233
								+/+ vs. +/BAC (#0262)	-0.6147	-0,8987 to -0,3307	Yes	****	<0,0001
								16S
								+/+ vs. +/BAC(#0111)	-0.08723	-0,3712 to 0,1967	No	ns	0.8383
								+/+ vs. +/BAC (#0139)	-0.163	-0,4470 to 0,1210	No	ns	0.4176
								+/+ vs. +/BAC (#0262)	-0.2362	-0,5202 to 0,04776	No	ns	0.1309
								tA
								+/+ vs. +/BAC(#0111)	0.1507	-0,1333 to 0,4347	No	ns	0.4854
								+/+ vs. +/BAC (#0139)	0.1679	-0,1161 to 0,4519	No	ns	0.3918
								+/+ vs. +/BAC (#0262)	0.1832	-0,1008 to 0,4671	No	ns	0.3168
								7S
								+/+ vs. +/BAC(#0111)	0.1902	-0,09382 to 0,4741	No	ns	0.2855
								+/+ vs. +/BAC (#0139)	0.1186	-0,1654 to 0,4026	No	ns	0.6725
								+/+ vs. +/BAC (#0262)	-0.01105	-0,2950 to 0,2729	No	ns	0.9996
								tL1
								+/+ vs. +/BAC(#0111)	0.1221	-0,1619 to 0,4061	No	ns	0.6521
								+/+ vs. +/BAC (#0139)	0.1612	-0,1228 to 0,4452	No	ns	0.4271
								+/+ vs. +/BAC (#0262)	0.174	-0,1100 to 0,4579	No	ns	0.3608
								tF
								+/+ vs. +/BAC(#0111)	0.1229	-0,1611 to 0,4068	No	ns	0.6477
								+/+ vs. +/BAC (#0139)	0.2444	-0,03962 to 0,5283	No	ns	0.1123
								+/+ vs. +/BAC (#0262)	0.2049	-0,07912 to 0,4888	No	ns	0.2266
								Test details	Mean 1	Mean 2	Mean Diff,	SE of diff,	N1	N2	t	DF
								CytB
								+/+ vs. +/BAC(#0111)	1	0.9151	0.08486	0.1162	3	3	0.7305	72
								+/+ vs. +/BAC (#0139)	1	0.816	0.184	0.1162	3	3	1.584	72
								+/+ vs. +/BAC (#0262)	1	1.053	-0.0531	0.1162	3	3	0.4571	72
								ND1
								+/+ vs. +/BAC(#0111)	1	0.8674	0.1326	0.1162	3	3	1.141	72
								+/+ vs. +/BAC (#0139)	1	0.6644	0.3356	0.1162	3	3	2.889	72
								+/+ vs. +/BAC (#0262)	1	1.01	-0.00979	0.1162	3	3	0.08428	72
								Cox1
								+/+ vs. +/BAC(#0111)	1	0.9062	0.09375	0.1162	3	3	0.8071	72
								+/+ vs. +/BAC (#0139)	1	0.7581	0.2419	0.1162	3	3	2.082	72
								+/+ vs. +/BAC (#0262)	1	1.336	-0.3359	0.1162	3	3	2.892	72
								12S
								+/+ vs. +/BAC(#0111)	1	1.236	-0.236	0.1162	3	3	2.031	72
								+/+ vs. +/BAC (#0139)	1	1.206	-0.2057	0.1162	3	3	1.771	72
								+/+ vs. +/BAC (#0262)	1	1.615	-0.6147	0.1162	3	3	5.291	72
								16S
								+/+ vs. +/BAC(#0111)	1	1.087	-0.08723	0.1162	3	3	0.7509	72
								+/+ vs. +/BAC (#0139)	1	1.163	-0.163	0.1162	3	3	1.403	72
								+/+ vs. +/BAC (#0262)	1	1.236	-0.2362	0.1162	3	3	2.033	72
								tA
								+/+ vs. +/BAC(#0111)	1	0.8493	0.1507	0.1162	3	3	1.297	72
								+/+ vs. +/BAC (#0139)	1	0.8321	0.1679	0.1162	3	3	1.445	72
								+/+ vs. +/BAC (#0262)	1	0.8168	0.1832	0.1162	3	3	1.577	72
								7S
								+/+ vs. +/BAC(#0111)	1	0.8098	0.1902	0.1162	3	3	1.637	72
								+/+ vs. +/BAC (#0139)	1	0.8814	0.1186	0.1162	3	3	1.021	72
								+/+ vs. +/BAC (#0262)	1	1.011	-0.01105	0.1162	3	3	0.09515	72
								tL1
								+/+ vs. +/BAC(#0111)	1	0.8779	0.1221	0.1162	3	3	1.051	72
								+/+ vs. +/BAC (#0139)	1	0.8388	0.1612	0.1162	3	3	1.388	72
								+/+ vs. +/BAC (#0262)	1	0.826	0.174	0.1162	3	3	1.498	72
								tF
								+/+ vs. +/BAC(#0111)	1	0.8771	0.1229	0.1162	3	3	1.058	72
								+/+ vs. +/BAC (#0139)	1	0.7556	0.2444	0.1162	3	3	2.103	72
								+/+ vs. +/BAC (#0262)	1	0.7951	0.2049	0.1162	3	3	1.763	72
