# Supplementary material for: High levels of TFAM repress mammalian mitochondrial DNA transcription in vivo
Source: Life Sci Alliance. 2021 Aug 30;4(11):e202101034. doi: 10.26508/lsa.202101034 (PMC8408345; doi:10.26508/lsa.202101034)
Supplement: Supplementary file 4 [file LSA-2021-01034_SdataFS2.xlsx]

## Sheet: Figure S2B
	10 w	+/+										+/BAC
	Male	4.545	4.77	4.76	4.29	4.46	5.72					4.955	2.705	3.37	5.075	6.25	4.985	4.585	4.785	4.545
	Female	2.35	4.425	4.095	3.15	5.345	4.01					6.42	4.59	4.435	5.485	5.34	5.485	5.02	5.525
	52 w
	Male	5.17	4.205	4.8	3.37	5.855	3.94					4.735	4.795	2.45	5.095	4.455	4.225	4.305
	Female	4.985	3.835	4.965	2.4925	5.28	3.975					5.245	5.485	5.83	5.205	4.485	5.175	4.45
	Two-way ANOVA	Ordinary						Compare each cell mean with the other cell mean in that row
	Alpha	0.05
								Number of families	1
	Source of Variation	% of total variation	P value	P value summary	Significant?			Number of comparisons per family	4
	Interaction	15.31	0.0342	*	Yes			Alpha	0.05
	Row Factor	1.315	0.8473	ns	No
	Column Factor	6.455	0.0523	ns	No			Šídák's multiple comparisons test	Predicted (LS) mean diff,	95,00% CI of diff,	Below threshold?	Summary	Adjusted P Value
	ANOVA table	SS (Type III)	DF	MS	F (DFn, DFd)	P value		+/+ - +/BAC
	Interaction	6.648	3	2.216	F (3, 47) = 3,134	P=0,0342		Male	0.1736	-0,9743 to 1,322	No	ns	0.9916
	Row Factor	0.5711	3	0.1904	F (3, 47) = 0,2692	P=0,8473		Female	-1.392	-2,568 to -0,2154	Yes	*	0.0144
	Column Factor	2.803	1	2.803	F (1, 47) = 3,964	P=0,0523		Male	0.2624	-0,9494 to 1,474	No	ns	0.9682
	Residual	33.24	47	0.7072				Female	-0.8696	-2,081 to 0,3422	No	ns	0.2499
	Difference between column means
	Predicted (LS) mean of +/+	4.366						Test details	Predicted (LS) mean 1	Predicted (LS) mean 2	Predicted (LS) mean diff,	SE of diff,	N1	N2	t	DF
	Predicted (LS) mean of +/BAC	4.823
	Difference between predicted means	-0.4563						+/+ - +/BAC
	SE of difference	0.2292						Male	4.758	4.584	0.1736	0.4432	6	9	0.3917	47
	95% CI of difference	-0,9174 to 0,004774						Female	3.896	5.288	-1.392	0.4542	6	8	3.064	47
								Male	4.557	4.294	0.2624	0.4679	6	7	0.5608	47
	Data summary							Female	4.255	5.125	-0.8696	0.4679	6	7	1.859	47
	Number of columns (Column Factor)	2
	Number of rows (Row Factor)	4
	Number of values	55

## Sheet: Figure S2C
	10w	+/+										+/BAC
	Male	3.345	3.785	3.835	2.845	3.425	4.895					4.105	2.935	3.66	4.045	4.63	3.785	3.805	3.285	3.645
	Female	3.665	4.055	4.04	3.38	5.015	3.39					3.5	3.615	4.115	3.33	4.245	3.855	5.005	5.23
	52w
	Male	2.96	2.66	3.115	2.3	3.445	2.805					2.83	2.77	2.13	3.325	2.83	2.88	2.82
	Female	3.785	2.765	3.34	1.9175	4.08	2.825					3.93	3.355	4.085	3.3	3.53	4.39	3.22
	Two-way ANOVA	Ordinary						Compare each cell mean with the other cell mean in that row
	Alpha	0.05
								Number of families	1
	Source of Variation	% of total variation	P value	P value summary	Significant?			Number of comparisons per family	4
	Interaction	2.766	0.5187	ns	No			Alpha	0.05
	Row Factor	37.62	<0,0001	****	Yes
	Column Factor	1.753	0.2334	ns	No			Šídák's multiple comparisons test	Predicted (LS) mean diff,	95,00% CI of diff,	Below threshold?	Summary	Adjusted P Value
	ANOVA table	SS (Type III)	DF	MS	F (DFn, DFd)	P value		+/+ - +/BAC
	Interaction	0.7483	3	0.2494	F (3, 47) = 0,7663	P=0,5187		Male	-0.07778	-0,8566 to 0,7010	No	ns	0.9983
	Row Factor	10.18	3	3.393	F (3, 47) = 10,42	P<0,0001		Female	-0.1877	-0,9857 to 0,6103	No	ns	0.9573
	Column Factor	0.4744	1	0.4744	F (1, 47) = 1,458	P=0,2334		Male	0.08298	-0,7391 to 0,9050	No	ns	0.9982
	Residual	15.3	47	0.3255				Female	-0.5684	-1,390 to 0,2537	No	ns	0.2829
	Difference between column means
	Predicted (LS) mean of +/+	3.403						Test details	Predicted (LS) mean 1	Predicted (LS) mean 2	Predicted (LS) mean diff,	SE of diff,	N1	N2	t	DF
	Predicted (LS) mean of +/BAC	3.591
	Difference between predicted means	-0.1877						+/+ - +/BAC
	SE of difference	0.1555						Male	3.688	3.766	-0.07778	0.3007	6	9	0.2587	47
	95% CI of difference	-0,5005 to 0,1251						Female	3.924	4.112	-0.1877	0.3081	6	8	0.6092	47
								Male	2.881	2.798	0.08298	0.3174	6	7	0.2614	47
	Data summary							Female	3.119	3.687	-0.5684	0.3174	6	7	1.791	47
	Number of columns (Column Factor)	2
	Number of rows (Row Factor)	4
	Number of values	55

## Sheet: Figure S2D
	10w	+/+										+/BAC
	Male	25.8	26.6	23.5	25.7	27.5	31					24.9	22	26.7	20.8	26.3	27.2	26.2	24.4	26.5
	Female	20.8	20.4	20.9	19.8	20.6	21					19.2	19.6	19.5	18.4	20.6	21.6	20.9	20.6
	52w
	Male	36.3	46	44.2	27.1	42.9	42.2					43.2	39.7	34.6	36.9	43.5	29.6	39.7
	Female	30.2	28.5	31.2	30.7	38.2	33.7					38.5	34	28	22.3	32.8	29.3	33.1
	Table Analyzed	Weight						Compare each cell mean with the other cell mean in that row
	Two-way ANOVA	Ordinary						Number of families	1
	Alpha	0.05						Number of comparisons per family	4
								Alpha	0.05
	Source of Variation	% of total variation	P value	P value summary	Significant?
	Interaction	0.09462	0.9753	ns	No			Šídák's multiple comparisons test	Predicted (LS) mean diff,	95,00% CI of diff,	Below threshold?	Summary	Adjusted P Value
	Row Factor	77.15	<0,0001	****	Yes
	Column Factor	0.5784	0.2601	ns	No			+/+ - +/BAC
								Male	1.683	-3,556 to 6,922	No	ns	0.8784
	ANOVA table	SS (Type III)	DF	MS	F (DFn, DFd)	P value		Female	0.5333	-4,835 to 5,902	No	ns	0.9983
	Interaction	3.13	3	1.043	F (3, 47) = 0,07084	P=0,9753		Male	1.612	-3,918 to 7,142	No	ns	0.9112
	Row Factor	2552	3	850.8	F (3, 47) = 57,76	P<0,0001		Female	0.9405	-4,590 to 6,471	No	ns	0.9869
	Column Factor	19.14	1	19.14	F (1, 47) = 1,299	P=0,2601
	Residual	692.3	47	14.73
								Test details	Predicted (LS) mean 1	Predicted (LS) mean 2	Predicted (LS) mean diff,	SE of diff,	N1	N2	t	DF
	Difference between column means
	Predicted (LS) mean of +/+	29.78						+/+ - +/BAC
	Predicted (LS) mean of +/BAC	28.59						Male	26.68	25	1.683	2.023	6	9	0.8322	47
	Difference between predicted means	1.192						Female	20.58	20.05	0.5333	2.073	6	8	0.2573	47
	SE of difference	1.046						Male	39.78	38.17	1.612	2.135	6	7	0.7549	47
	95% CI of difference	-0,9120 to 3,297						Female	32.08	31.14	0.9405	2.135	6	7	0.4405	47
	Data summary
	Number of columns (Column Factor)	2
	Number of rows (Row Factor)	4
	Number of values	55

## Sheet: Figure S2E
	10w	+/+										+/BAC
	Male, day	15.4759	16.0436	15.8331	16.0081	12.779	13.2739					14.6842	12.1547	13.828	21.3391	13.8242	16.3603	15.8629	17.0836	16.2648
	Female, day	21.3388	19.4507	19.0377	16.4938	19.5707						18.6009	22.5893	19.4705	20.5066	20.7643	19.9574	19.8362	14.0552
	Male, night	18.7333	19.6879	21.4968	19.7584	15.3641	15.2601					19.4291	15.0806	18.1162	27.1496	17.5876	21.5713	21.3077	21.9156	20.8649
	Female, night	27.185	25.3311	25.3791	20.2517	24.7558						25.1992	30.834	25.2224	28.5017	26.7733	25.0777	25.4902	20.7958
	52w
	Male, day			16.504	16.7366	15.9311	16.665	15.9226	15.3724			15.3511	16.5228	14.5466	16.3976	13.8615	15.2736	14.9828
	Female, day			17.5372	17.7214	18.7187	14.1071	18.252	18.8903			21.8346	17.1745	18.9021	19.7922	18.777	12.723	17.223
	Male, night			20.253	19.4524	19.4899	20.9955	18.0249	18.4831			19.0867	20.0176	17.6365	20.2598	14.6723	19.6003	19.0363
	Female, night			20.0318	22.4331	22.6019	16.6654	23.3887	23.8068			30.5084	25.2002	22.2467	24.3607	24.467	16.7417	21.1179
	Two-way ANOVA	Ordinary						Compare each cell mean with the other cell mean in that row
	Alpha	0.05
								Number of families	1
	Source of Variation	% of total variation	P value	P value summary	Significant?			Number of comparisons per family	8
	Interaction	1.763	0.6921	ns	No			Alpha	0.05
	Row Factor	59.44	<0,0001	****	Yes
	Column Factor	0.6783	0.1806	ns	No			Šídák's multiple comparisons test	Predicted (LS) mean diff,	95,00% CI of diff,	Below threshold?	Summary	Adjusted P Value
	ANOVA table	SS (Type III)	DF	MS	F (DFn, DFd)	P value		+/+ - +/BAC
	Interaction	29.55	7	4.222	F (7, 92) = 0,6757	P=0,6921		Male, day	-0.8091	-4,486 to 2,868	No	ns	0.998
	Row Factor	996.5	7	142.4	F (7, 92) = 22,78	P<0,0001		Female, day	-0.2942	-4,271 to 3,683	No	ns	>0,9999
	Column Factor	11.37	1	11.37	F (1, 92) = 1,820	P=0,1806		Male, night	-1.952	-5,629 to 1,724	No	ns	0.7056
	Residual	574.8	92	6.248				Female, night	-1.406	-5,383 to 2,571	No	ns	0.9576
								Male, day	0.912	-2,969 to 4,793	No	ns	0.9969
	Difference between column means							Female, day	-0.5231	-4,404 to 3,358	No	ns	>0,9999
	Predicted (LS) mean of +/+	18.96						Male, night	0.8341	-3,047 to 4,715	No	ns	0.9983
	Predicted (LS) mean of +/BAC	19.62						Female, night	-2.032	-5,914 to 1,849	No	ns	0.7205
	Difference between predicted means	-0.6589
	SE of difference	0.4884
	95% CI of difference	-1,629 to 0,3112						Test details	Predicted (LS) mean 1	Predicted (LS) mean 2	Predicted (LS) mean diff,	SE of diff,	N1	N2	t	DF
	Data summary							+/+ - +/BAC
	Number of columns (Column Factor)	2						Male, day	14.9	15.71	-0.8091	1.317	6	9	0.6141	92
	Number of rows (Row Factor)	8						Female, day	19.18	19.47	-0.2942	1.425	5	8	0.2065	92
	Number of values	108						Male, night	18.38	20.34	-1.952	1.317	6	9	1.482	92
								Female, night	24.58	25.99	-1.406	1.425	5	8	0.9869	92
								Male, day	16.19	15.28	0.912	1.391	6	7	0.6558	92
								Female, day	17.54	18.06	-0.5231	1.391	6	7	0.3762	92
								Male, night	19.45	18.62	0.8341	1.391	6	7	0.5998	92
								Female, night	21.49	23.52	-2.032	1.391	6	7	1.461	92

## Sheet: Figure S2F
	10w	+/+										+/BAC
	Male, day	0.613333	0.337658	1.49568	0.569679	0.192844	0.492768					1.57036	0.562748	0.166757	2.59321	0.363073	0.806514	0.416518	0.717277	0.349375
	Female, day	0.888829	5.15946	0.805229	0.694495	1.05848	0.367098					1.3027	1.39162	0.898578	1.33743	2.22106	0.81067	3.39496	0.800045
	Male, night	3.948	1.76664	11.6557	1.73188	1.82754	2.10223					5.63973	6.72668	2.05941	11.7136	1.78357	3.65687	5.06568	4.88186	1.82732
	Female, night	6.55627	20.374	5.5883	6.25777	9.25477	4.18627					13.006	16.2769	5.49589	7.46371	8.70232	6.97986	11.7677	8.80809
	52w
	Male, day	0.977396	0.653958	1.32552	0.165156	1.04161	0.342448					0.441458	0.658073	0.266823	1.7999	0.505885	1.64318	0.223177
	Female, day	1.43865	1.65099	2.45359	1.21964	1.59859	0.804688					1.09698	0.945469	2.13474	1.7149	0.694219	0.763385	1.43875
	Male, night	6.85745	2.30156	4.28104	1.42349	3.83469	1.35083					2.7888	3.19729	1.47151	5.74078	1.05646	5.89984	1.30344
	Female, night	5.29375	7.13406	7.04755	4.27896	8.59698	3.34901					32.7129	25.405	5.95948	6.09479	4.54339	4.76964	6.56458
	Two-way ANOVA	Ordinary						Compare each cell mean with the other cell mean in that row
	Alpha	0.05
								Number of families	1
	Source of Variation	% of total variation	P value	P value summary	Significant?			Number of comparisons per family	8
	Interaction	4.072	0.3616	ns	No			Alpha	0.05
	Row Factor	43.38	<0,0001	****	Yes
	Column Factor	1.028	0.1641	ns	No			Šídák's multiple comparisons test	Predicted (LS) mean diff,	95,00% CI of diff,	Below threshold?	Summary	Adjusted P Value
	ANOVA table	SS (Type III)	DF	MS	F (DFn, DFd)	P value		+/+ - +/BAC
	Interaction	111.2	7	15.88	F (7, 94) = 1,113	P=0,3616		Male, day	-0.2214	-5,776 to 5,333	No	ns	>0,9999
	Row Factor	1185	7	169.2	F (7, 94) = 11,86	P<0,0001		Female, day	-0.02403	-5,715 to 5,667	No	ns	>0,9999
	Column Factor	28.07	1	28.07	F (1, 94) = 1,967	P=0,1641		Male, night	-0.9785	-6,533 to 4,576	No	ns	0.9996
	Residual	1342	94	14.27				Female, night	-1.11	-6,801 to 4,582	No	ns	0.9992
								Male, day	-0.0402	-5,903 to 5,823	No	ns	>0,9999
	Difference between column means							Female, day	0.2722	-5,591 to 6,135	No	ns	>0,9999
	Predicted (LS) mean of +/+	3.278						Male, night	0.2761	-5,587 to 6,139	No	ns	>0,9999
	Predicted (LS) mean of +/BAC	4.299						Female, night	-6.343	-12,21 to -0,4799	Yes	*	0.0259
	Difference between predicted means	-1.021
	SE of difference	0.7281
	95% CI of difference	-2,467 to 0,4245						Test details	Predicted (LS) mean 1	Predicted (LS) mean 2	Predicted (LS) mean diff,	SE of diff,	N1	N2	t	DF
	Data summary							+/+ - +/BAC
	Number of columns (Column Factor)	2						Male, day	0.617	0.8384	-0.2214	1.991	6	9	0.1112	94
	Number of rows (Row Factor)	8						Female, day	1.496	1.52	-0.02403	2.04	6	8	0.01178	94
	Number of values	110						Male, night	3.839	4.817	-0.9785	1.991	6	9	0.4915	94
								Female, night	8.703	9.813	-1.11	2.04	6	8	0.5439	94
								Male, day	0.751	0.7912	-0.0402	2.102	6	7	0.01913	94
								Female, day	1.528	1.255	0.2722	2.102	6	7	0.1295	94
								Male, night	3.342	3.065	0.2761	2.102	6	7	0.1313	94
								Female, night	5.95	12.29	-6.343	2.102	6	7	3.018	94

## Sheet: Figure S2G
	BAC(#0111)	BAC(#0139)	BAC(#0262)
	3	9	9
	8	8	2
	6	5	5
	10	8	3
	6	9	6
	5	5	10
	4	2	8
	10	8	8
	7	5	10
	6		5
	Column B	BAC(#0139)		Column C	BAC(#0262)		Column C	BAC(#0262)
	vs.	vs,		vs.	vs,		vs.	vs,
	Column A	BAC(#0111)		Column A	BAC(#0111)		Column B	BAC(#0139)
	Unpaired t test			Unpaired t test			Unpaired t test
	P value	0.9597		P value	0.9322		P value	0.9712
	P value summary	ns		P value summary	ns		P value summary	ns
	Significantly different (P < 0.05)?	No		Significantly different (P < 0.05)?	No		Significantly different (P < 0.05)?	No
	One- or two-tailed P value?	Two-tailed		One- or two-tailed P value?	Two-tailed		One- or two-tailed P value?	Two-tailed
	t, df	t=0,05122, df=17		t, df	t=0,08628, df=18		t, df	t=0,03662, df=17
	How big is the difference?			How big is the difference?			How big is the difference?
	Mean of column A	6.5		Mean of column A	6.5		Mean of column B	6.556
	Mean of column B	6.556		Mean of column C	6.6		Mean of column C	6.6
	Difference between means (B - A) ± SEM	0,05556 ± 1,085		Difference between means (C - A) ± SEM	0,1000 ± 1,159		Difference between means (C - B) ± SEM	0,04444 ± 1,214
	95% confidence interval	-2,233 to 2,344		95% confidence interval	-2,335 to 2,535		95% confidence interval	-2,516 to 2,605
	R squared (eta squared)	0.0001543		R squared (eta squared)	0.0004134		R squared (eta squared)	7.887e-05
	F test to compare variances			F test to compare variances			F test to compare variances
	F, DFn, Dfd	1,072, 8, 9		F, DFn, Dfd	1,493, 9, 9		F, DFn, Dfd	1,392, 9, 8
	P value	0.9107		P value	0.5601		P value	0.6516
	P value summary	ns		P value summary	ns		P value summary	ns
	Significantly different (P < 0.05)?	No		Significantly different (P < 0.05)?	No		Significantly different (P < 0.05)?	No
	Data analyzed			Data analyzed			Data analyzed
	Sample size, column A	10		Sample size, column A	10		Sample size, column B	9
	Sample size, column B	9		Sample size, column C	10		Sample size, column C	10
