# Supplementary material for: High levels of TFAM repress mammalian mitochondrial DNA transcription in vivo
Source: Life Sci Alliance. 2021 Aug 30;4(11):e202101034. doi: 10.26508/lsa.202101034 (PMC8408345; doi:10.26508/lsa.202101034)
Supplement: Supplementary file 5 [file LSA-2021-01034_SdataF2.xlsx]

## Sheet: Figure 2B
						Survival proportions
	Day	Con	+/CAG			Day	Con	+/CAG
	1					0	100	100
	2					1
	3					2
	4					3
	5					4
	6					5
	7					6
	8					7
	9					8
	10					9
	11					10
	12					11
	13					12
	14					13
	15					14
	16	0	1			15
	17					16	100	92.3077
	18					17
	19					18
	20	0	1			19
	21	0	1			20	100	84.6154
	22	0	1			21	100	76.9231
	23					22	100	69.2308
	24					23
	25	0	1			24
	25	0	1			25	100	53.8462
	26					26
	27	0	1			27	100	46.1538
	28					28
	29	0	1			29	100	38.4615
	30	0	1			30	100	23.0769
	30	0	1			31
	31					32	100	15.3846
	32	0	1			33
	33					34
	34					35	100	0
	35	0	1			36	100
	35	0	1			37
	36	0				38
						39
						40

## Sheet: Figure 2C
	Con	+/CAG			Table Analyzed	CAG_3w body weight
	10.86	3.7
	11.64	4.92			Column B	+/CAG
	9.15	5.22			vs.	vs,
	9.32	5.8			Column A	Con
	8.99	4.94
	6.53	9.32			Unpaired t test
	4.06	8.99			P value	0.028
	4.29	4.81			P value summary	*
	4.36	6.53			Significantly different (P < 0.05)?	Yes
	7.3	4.06			One- or two-tailed P value?	Two-tailed
	7.8	4.29			t, df	t=2,352, df=22
	8.02	4.36
					How big is the difference?
					Mean of column A	7.693
					Mean of column B	5.578
					Difference between means (B - A) ± SEM	-2,115 ± 0,8991
					95% confidence interval	-3,980 to -0,2504
					R squared (eta squared)	0.201
					F test to compare variances
					F, DFn, Dfd	1,874, 11, 11
					P value	0.3125
					P value summary	ns
					Significantly different (P < 0.05)?	No
					Data analyzed
					Sample size, column A	12
					Sample size, column B	12
