# Supplementary material for: High levels of TFAM repress mammalian mitochondrial DNA transcription in vivo
Source: Life Sci Alliance. 2021 Aug 30;4(11):e202101034. doi: 10.26508/lsa.202101034 (PMC8408345; doi:10.26508/lsa.202101034)
Supplement: Supplementary file 7 [file LSA-2021-01034_SdataF3.xlsx]

## Sheet: Figure 3B
		Con						+/CAG
	heart	0.951309	1.04382	1.00487	1.05606	0.943942		4.72614	3.64276	4.42511	4.35847	5.1246
	liver	0.798349	1.2254	0.976255	1.03459	0.965411		2.25539	2.63512	1.91127	1.58621
	skeletal muscle	1.20232	0.437349	1.36033	0.508778	1.49122		3.18857	2.73072	4.71286	4.7134
	Two-way ANOVA	Ordinary						Compare each cell mean with the other cell mean in that row
	Alpha	0.05
								Number of families	1
	Source of Variation	% of total variation	P value	P value summary	Significant?			Number of comparisons per family	3
	Interaction	10.82	0.0002	***	Yes			Alpha	0.05
	Row Factor	10.82	0.0002	***	Yes
	Column Factor	65.79	<0,0001	****	Yes			Šídák's multiple comparisons test	Predicted (LS) mean diff,	95,00% CI of diff,	Below threshold?	Summary	Adjusted P Value
	ANOVA table	SS (Type III)	DF	MS	F (DFn, DFd)	P value		Con - +/CAG
	Interaction	6.908	2	3.454	F (2, 22) = 12,55	P=0,0002		heart	-3.455	-4,313 to -2,598	Yes	****	<0,0001
	Row Factor	6.908	2	3.454	F (2, 22) = 12,55	P=0,0002		liver	-1.097	-2,006 to -0,1877	Yes	*	0.015
	Column Factor	42	1	42	F (1, 22) = 152,6	P<0,0001		skeletal muscle	-2.836	-3,746 to -1,927	Yes	****	<0,0001
	Residual	6.056	22	0.2753
	Difference between column means							Test details	Predicted (LS) mean 1	Predicted (LS) mean 2	Predicted (LS) mean diff,	SE of diff,	N1	N2	t	DF
	Predicted (LS) mean of Con	1
	Predicted (LS) mean of +/CAG	3.463						Con - +/CAG
	Difference between predicted means	-2.463						heart	1	4.455	-3.455	0.3318	5	5	10.41	22
	SE of difference	0.1994						liver	1	2.097	-1.097	0.352	5	4	3.117	22
	95% CI of difference	-2,876 to -2,049						skeletal muscle	1	3.836	-2.836	0.352	5	4	8.059	22
	Data summary
	Number of columns (Column Factor)	2
	Number of rows (Row Factor)	3
	Number of values	28

## Sheet: Figure 3C
		Con										+/CAG
	heart	0.886211	0.884446	1.22934	0.905573	1.06556	1.02887					5.08353	7.90601	7.04919	3.25101	6.35625	6.41782	8.40485
	skeletal muscle	1.02231	0.814563	1.16312								1.10753	0.846911	0.909155
	Two-way ANOVA	Ordinary						Compare each cell mean with the other cell mean in that row
	Alpha	0.05
								Number of families	1
	Source of Variation	% of total variation	P value	P value summary	Significant?			Number of comparisons per family	3
	Interaction	27.17	<0,0001	****	Yes			Alpha	0.05
	Row Factor	27.17	<0,0001	****	Yes
	Column Factor	9.835	0.0008	***	Yes			Šídák's multiple comparisons test	Predicted (LS) mean diff,	95,00% CI of diff,	Below threshold?	Summary	Adjusted P Value
	ANOVA table	SS (Type III)	DF	MS	F (DFn, DFd)	P value		Con - +/CAG
	Interaction	77.44	2	38.72	F (2, 27) = 19,53	P<0,0001		heart	-6.138	-8,073 to -4,202	Yes	****	<0,0001
	Row Factor	77.44	2	38.72	F (2, 27) = 19,53	P<0,0001		liver	0.1304	-1,863 to 2,124	No	ns	0.9978
	Column Factor	28.03	1	28.03	F (1, 27) = 14,14	P=0,0008		skeletal muscle	0.04547	-2,881 to 2,972	No	ns	>0,9999
	Residual	53.54	27	1.983
	Difference between column means							Test details	Predicted (LS) mean 1	Predicted (LS) mean 2	Predicted (LS) mean diff,	SE of diff,	N1	N2	t	DF
	Predicted (LS) mean of Con	1
	Predicted (LS) mean of +/CAG	2.987						Con - +/CAG
	Difference between predicted means	-1.987						heart	1	7.138	-6.138	0.7605	6	8	8.071	27
	SE of difference	0.5285						liver	1	0.8696	0.1304	0.7834	6	7	0.1664	27
	95% CI of difference	-3,072 to -0,9029						skeletal muscle	1	0.9545	0.04547	1.15	3	3	0.03954	27
	Data summary
	Number of columns (Column Factor)	2
	Number of rows (Row Factor)	3
	Number of values	33

## Sheet: Figure 3E
	heart	Con					+/CAG
	CytB	1.3027	1.26263	1.03507	0.578614	0.820984	0.495705	0.57832	0.531154	0.422637	0.364636
	ND1	1.17839	1.38895	1.00564	0.621637	0.805387	0.674006	0.736825	0.585217	0.590871	0.789016
	COX1	1.30526	1.32599	1.05878	0.535114	0.774857	0.581025	0.696186	0.657265	0.499001	0.514329
	12S rRNA	1.37658	1.44058	1.08365	0.425781	0.673414	0.761141	0.854884	0.834303	0.685239	0.500758
	sk. Muscle
	CytB	0.990267	0.778733	1.10337	1.096	1.03164	0.0409138	0.0429329	0.0392648	0.0568713	0.0335764
	ND1	0.990933	0.78435	1.12639	1.10812	0.990203	0.0666047	0.0698279	0.0564371	0.0874212	0.062349
	COX1	1.03062	0.794391	1.06584	1.13566	0.973483	0.068919	0.0709091	0.0645509	0.0989796	0.0614027
	12S rRNA	1.07006	0.807701	1.14925	1.06021	0.912779	0.19332	0.191223	0.174547	0.215084	0.160555
	Two-way ANOVA	Ordinary						Compare each cell mean with the other cell mean in that row
	Alpha	0.05
								Number of families	1
	Source of Variation	% of total variation	P value	P value summary	Significant?			Number of comparisons per family	8
	Interaction	10.88	<0,0001	****	Yes			Alpha	0.05
	Row Factor	10.88	<0,0001	****	Yes
	Column Factor	60.45	<0,0001	****	Yes			Šídák's multiple comparisons test	Mean Diff,	95,00% CI of diff,	Below threshold?	Summary	Adjusted P Value
	ANOVA table	SS	DF	MS	F (DFn, DFd)	P value		Con - +/CAG
	Interaction	1.497	7	0.2138	F (7, 64) = 5,592	P<0,0001		CytB	0.5215	0,1728 to 0,8702	Yes	***	0.0006	heart
	Row Factor	1.497	7	0.2138	F (7, 64) = 5,592	P<0,0001		ND1	0.3248	-0,02392 to 0,6735	No	ns	0.0831
	Column Factor	8.315	1	8.315	F (1, 64) = 217,4	P<0,0001		COX1	0.4104	0,06171 to 0,7592	Yes	*	0.0119
	Residual	2.447	64	0.03824				12S rRNA	0.2727	-0,07600 to 0,6215	No	ns	0.2229
								CytB	0.9573	0,6086 to 1,306	Yes	****	<0,0001	sk. Muscle
	Difference between column means							ND1	0.9315	0,5827 to 1,280	Yes	****	<0,0001
	Mean of Con	1						COX1	0.927	0,5783 to 1,276	Yes	****	<0,0001
	Mean of +/CAG	0.3552						12S rRNA	0.8131	0,4643 to 1,162	Yes	****	<0,0001
	Difference between means	0.6448
	SE of difference	0.04373
	95% CI of difference	0,5574 to 0,7321						Test details	Mean 1	Mean 2	Mean Diff,	SE of diff,	N1	N2	t	DF
	Data summary							Con - +/CAG
	Number of columns (Column Factor)	2						CytB	1	0.4785	0.5215	0.1237	5	5	4.217	64
	Number of rows (Row Factor)	8						ND1	1	0.6752	0.3248	0.1237	5	5	2.626	64
	Number of values	80						COX1	1	0.5896	0.4104	0.1237	5	5	3.319	64
								12S rRNA	1	0.7273	0.2727	0.1237	5	5	2.205	64
								CytB	1	0.04271	0.9573	0.1237	5	5	7.74	64
								ND1	1	0.06853	0.9315	0.1237	5	5	7.531	64
								COX1	1	0.07295	0.927	0.1237	5	5	7.496	64
								12S rRNA	1	0.1869	0.8131	0.1237	5	5	6.574	64
